# Supplementary material
Source: Springer Nature journal article supplement (https://www.springermedizin.de/resource/supplementary/12974_2011_486_MOESM2_ESM.pdf/9601398)

A

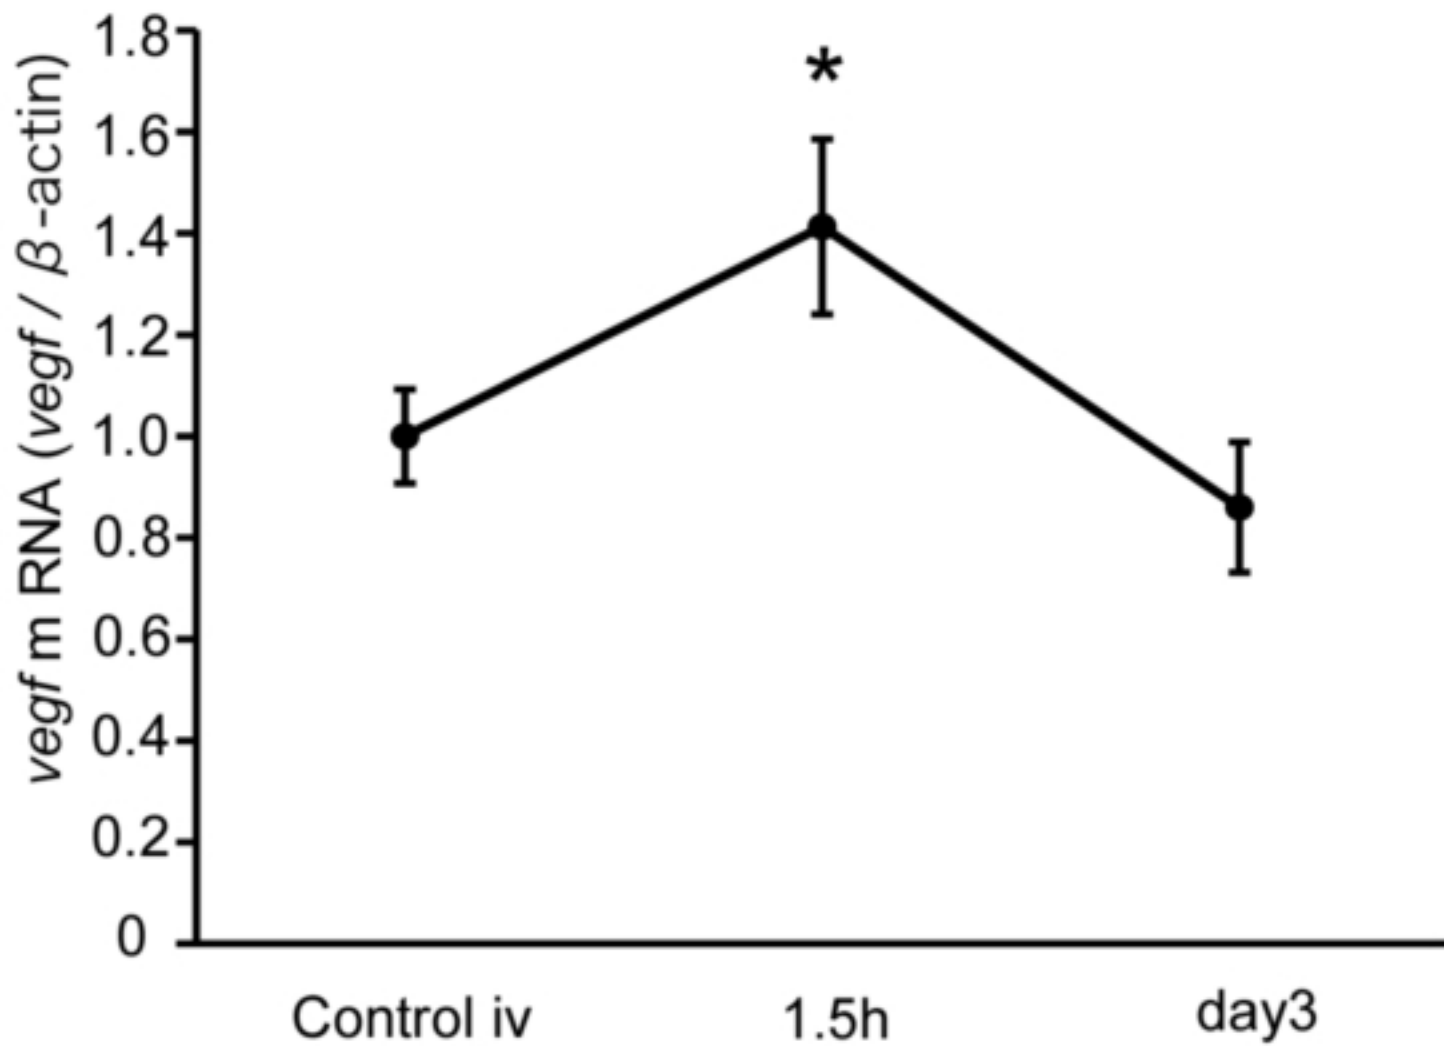

B

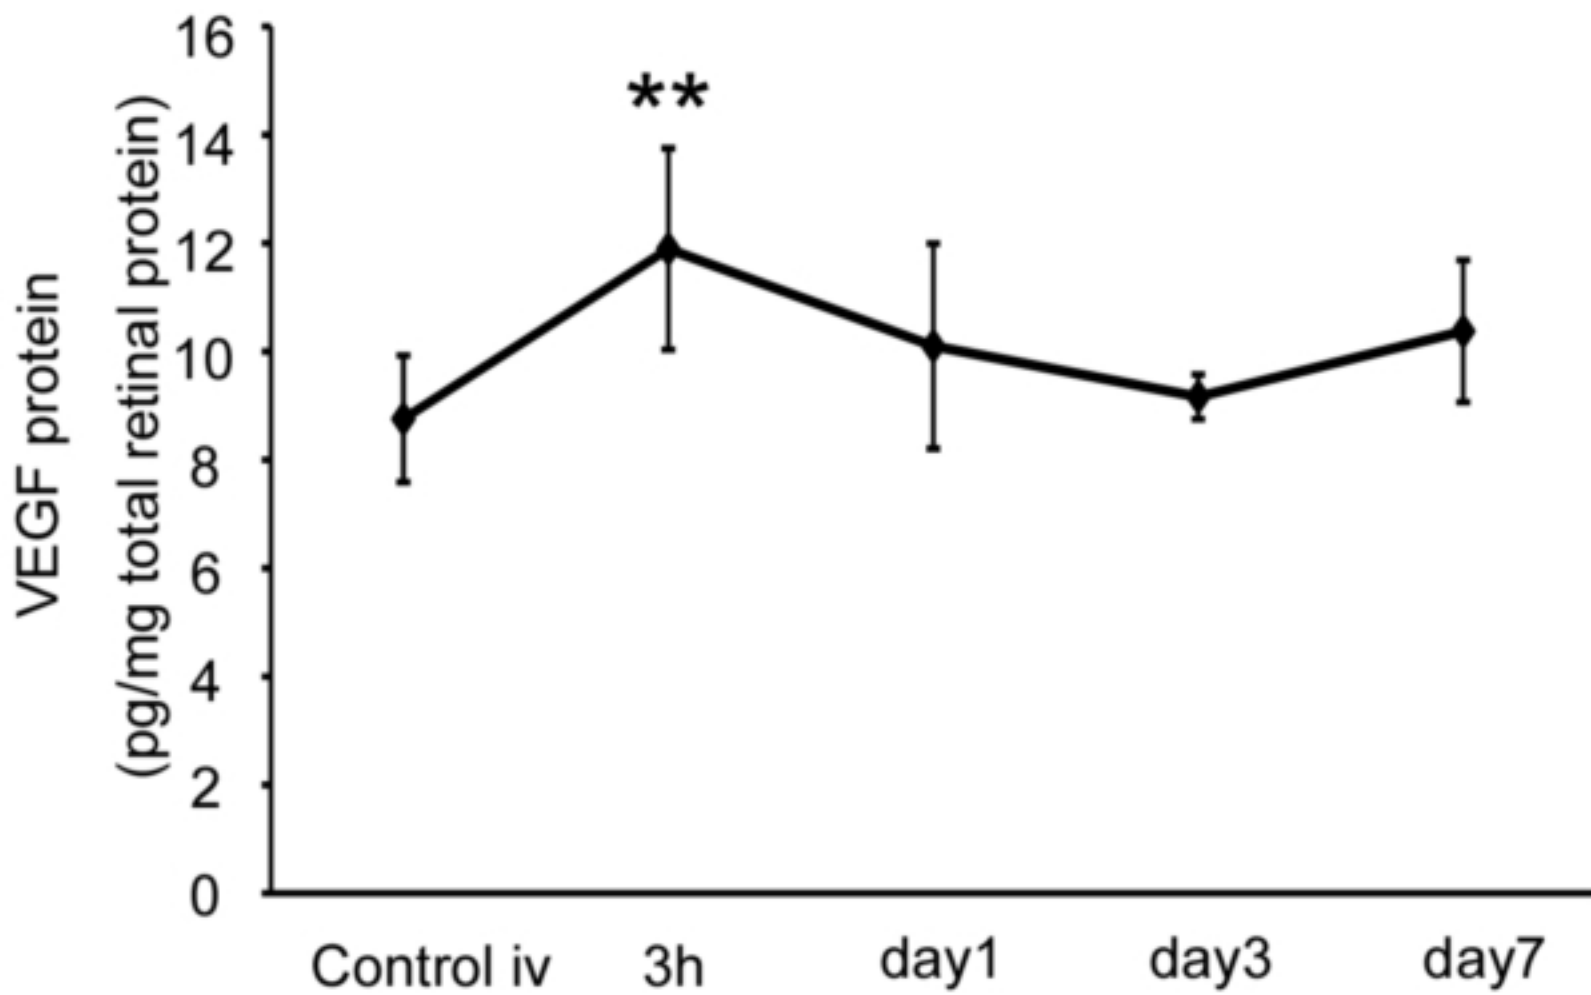

Supplement: MOESM2 [file 9601398]
